# Supplementary material
Source: publisher figshare collection journal article supplement (https://tandf.figshare.com/ndownloader/files/21725886)
Supplement: Supplementary file 1 [file 21725886]

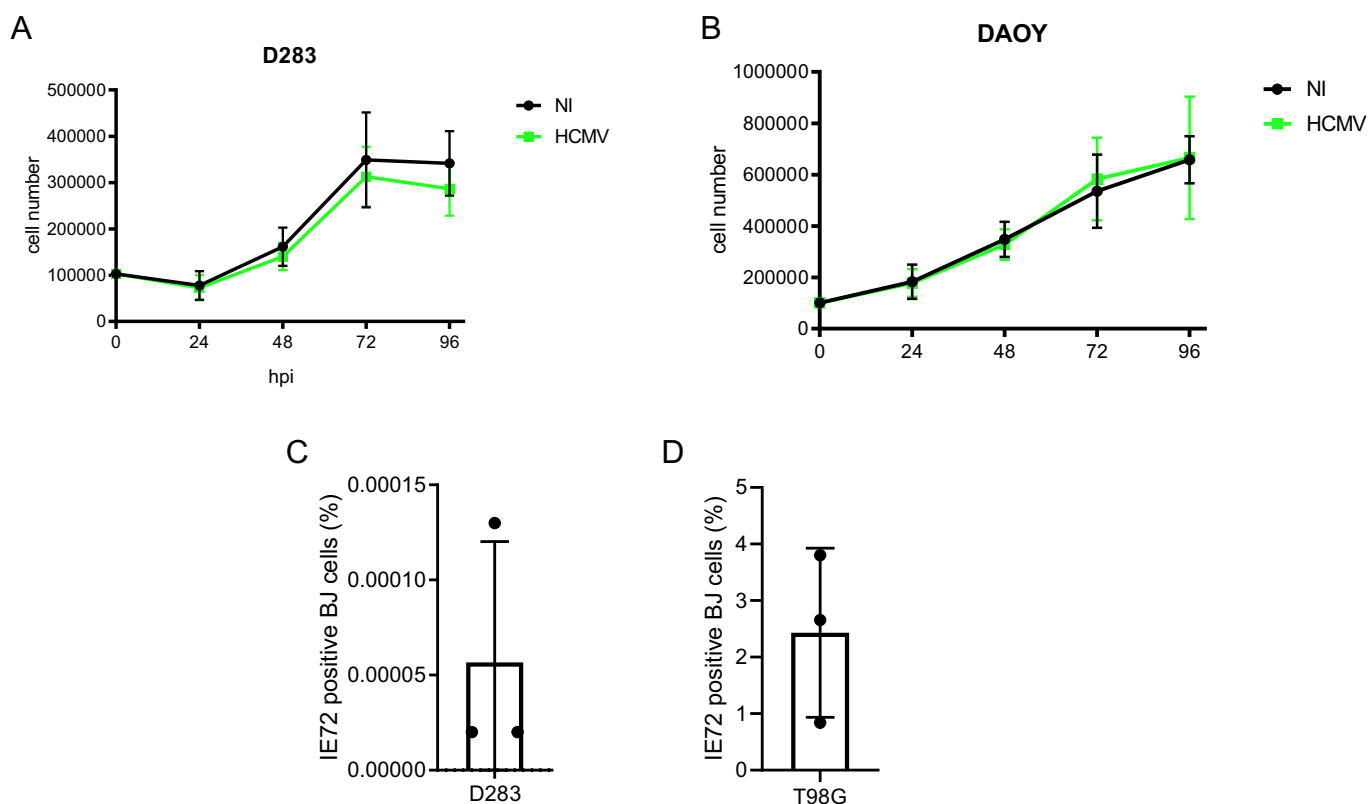

## Supplementary Figure S1

### Proliferation of HCMV-infected medulloblastoma cell lines and non-permissive character of the D283 stem-like cells.

(A,B) D283 (A) and DAOY (B) cells were infected with VR1814 HCMV (MOI 3) and counted every 24 h. Graphs show mean numbers of cells  $\pm$  s.d. NI – non-infected cells (black); HCMV – infected cells (green). (C,D) human D283 medulloblastoma cells (C) and T98G glioblastoma cells (semi-permissive control) (D) were infected with AD169 HCMV (MOI 3). At 120 hpi cell-free supernatants were transferred onto fresh BJ fibroblast cultures, incubated for 1 h and washed. After 24 h, BJ cells were fixed and analyzed for expression of HCMV IE72/86 protein by immunofluorescence microscopy. Graphs show the mean percentage of IE72/86 positive BJ cells  $\pm$  s.d.
